# Supplementary material
Source: PubMed Central journal article supplement (PMC299921)
Supplement: pnas_100_25_15137__2.pdf [file pnas_100_25_15137__2.pdf]

M K A

NZ2 1 CAGTTTTTTAGCTAGTTAAAACATAAATAGTAAAGCTAAAAAGAGGAGTTCTGGAGTCTTGCAACAACCAGGATGAAGGC  
 NZ7 1 .....AT.....G.....A.....A.....A.....

V L L L A L L G A F T N A A P L L E S Q R S N S E E

NZ2 81 GGTGTTGTTGCTGGCGTTACTGGGAGCGTTACCAACGACGCGCTTTGTTAGAAAGCCAGCGTTCTAACAGTGAGGAAA  
 NZ7 81 .....A..C.....AGC..A.....CT..GG.....CA..GG  
S N L G A

K A N F C S T H N D E V Y A R F R L Q M R V G V R H S

NZ2 161 AAGCAAATTTCTGCTCGACGCATAATGATGAAGTGACGCCAGGTTTCAGGCTTCAGATGCGCGTGCGGTGTACGACACAGT  
 NZ7 161 ...A..A.....C...CA.....T.....T.....  
E E K H K W

P L Y T P S N M C M L D I E D S V E D I E E S T E

NZ2 241 CCGCTCTACACTCCCAGCAACATGTGCATGCTGGACATAGAAGACTCCGTTGAGGACATAGAAGAGTCCACAGAAA----  
 NZ7 241 T.....G.....A.....TACG..T.....GC.....G...CAGA  
S A M T V G T E

K E Y A S T A T G E A A G V N V S V A L V

NZ2 317 -----AAGAATACGCGTCTACGGCCACGGGTGAGGCGGCCGGAGTGAACGTGTCACTGAGTGG  
 NZ7 321 AGACTCCACGGTGGAAA.....A.....G.....A.....T.....AA.....C.....A.....  
D S T V E T A D N M

G E G V S I P F S Y I G L G F N P S L E D S Y L Y V N

NZ2 380 GAGAAGGCGTGAGCATACCGTTTAGTTACATAGGCCTTGGAATCAACCCGTCGCTTGAAGATAGCTACCTGTACGTCAAC  
 NZ7 401 .....C..A.....C.....A..T.....A.....G.....  
L L K G

V S S R A P W V K Q T S D L S A N G G W G I K Q V L E

NZ2 460 GTCTCGTCACGAGCTCCTTGGGTTAAACAGACTTCGGACCTATCCGCGAACGCGCGCTGGGGTATCAAACAGGTTCTAGA  
 NZ7 481 .....G.....A..C.....CT.....A.....T.....  
D Q L D

K E L L A I Q I G C D N Q K F P E E P T T T P P S

NZ2 540 AAAAGAGTTACTGGCCATCCAAATAGGGTGCGACAACCAAAATTTCCCGAAGAACCCACAACCTAC---ACCCCTCAC  
 NZ7 561 .....A.....G.....CCA.....  
I Q

P V T T T L S S T T P D L N E E N T E N T P T T T G

NZ2 617 CTGTCACCTACAACGCTTTCTCTCAACACT---CCAGATCTGAATGAAGAAAACACAGAAAATACGCCGACGACCACCGGC  
 NZ7 641 .....A.....C.....GACTTT..A..C.....A..C.....C..C.....C.....  
P T L N P N D T P

A S V D R K R N P A D I D F S L L V D P R C V T S V D

NZ2 694 GCCAGTGTAGACAGAAAGCGCAATCCAGCTGACATTGACTTCTCGCTGCTCGTGACCCCGATGCGTGACCTCTGTAGA  
 NZ7 721 .....G.....A.....A.....A.....A.....A.....A.....  
G D I N

L H V E L R D A C I D Y K Q E S P L S L K G K Y G D

NZ2 774 CCTGCACGTCGAGCTCAGGGACGCGTCATAGACTACAAACAAGAGTCGCCGTTGTCGCTGAAGGGGAAATATGGAGACG  
 NZ7 801 .....T.....A..A.....G.....  
F I K M

G E L V K K E I K D V G K N H N M C S L N L N P G N \*

NZ2 854 GCGAACTAGTAAAAAAGGAGATTAAAGACGTGGGAAAGAATCACAATATGTGCAGTCTTAACCTCAACCCTGGCAATTGA  
 NZ7 881 ..T.....G.....C.....C.....C.....A..  
E H \*

NZ2 934 GCTGTTTTTATTCGGCAATA  
 NZ7 961 .....A.....
